# Supplementary material
Source: Springer Nature journal article supplement (https://www.springermedizin.de/resource/supplementary/12958_2008_439_MOESM3_ESM.pdf/9567888)
Supplement: MOESM3 [file 9567888]

|               |               |               |               |               |
|---------------|---------------|---------------|---------------|---------------|
| $\frac{1}{5}$ | 0             | 0             | 0             | 0             |
| 0             | $\frac{1}{5}$ | 0             | 0             | 0             |
| 0             | 0             | $\frac{1}{5}$ | 0             | 0             |
| 0             | 0             | 0             | $\frac{1}{5}$ | 0             |
| 0             | 0             | 0             | 0             | $\frac{1}{5}$ |

|   |               |               |               |   |
|---|---------------|---------------|---------------|---|
| 0 | $\frac{1}{5}$ | 0             | 0             | 0 |
| 0 | 0             | $\frac{1}{5}$ | 0             | 0 |
| 0 | 0             | $\frac{1}{5}$ | 0             | 0 |
| 0 | 0             | $\frac{1}{5}$ | 0             | 0 |
| 0 | 0             | 0             | $\frac{1}{5}$ | 0 |

|   |   |               |   |   |
|---|---|---------------|---|---|
| 0 | 0 | $\frac{1}{5}$ | 0 | 0 |
| 0 | 0 | $\frac{1}{5}$ | 0 | 0 |
| 0 | 0 | $\frac{1}{5}$ | 0 | 0 |
| 0 | 0 | $\frac{1}{5}$ | 0 | 0 |
| 0 | 0 | $\frac{1}{5}$ | 0 | 0 |

|   |               |               |               |   |
|---|---------------|---------------|---------------|---|
| 0 | 0             | 0             | $\frac{1}{5}$ | 0 |
| 0 | 0             | $\frac{1}{5}$ | 0             | 0 |
| 0 | 0             | $\frac{1}{5}$ | 0             | 0 |
| 0 | 0             | $\frac{1}{5}$ | 0             | 0 |
| 0 | $\frac{1}{5}$ | 0             | 0             | 0 |

|               |               |               |               |               |
|---------------|---------------|---------------|---------------|---------------|
| 0             | 0             | 0             | 0             | $\frac{1}{5}$ |
| 0             | 0             | 0             | $\frac{1}{5}$ | 0             |
| 0             | 0             | $\frac{1}{5}$ | 0             | 0             |
| 0             | $\frac{1}{5}$ | 0             | 0             | 0             |
| $\frac{1}{5}$ | 0             | 0             | 0             | 0             |

|               |               |               |               |               |
|---------------|---------------|---------------|---------------|---------------|
| 0             | 0             | 0             | 0             | 0             |
| 0             | 0             | 0             | 0             | $\frac{1}{5}$ |
| 0             | $\frac{1}{5}$ | $\frac{1}{5}$ | $\frac{1}{5}$ | 0             |
| $\frac{1}{5}$ | 0             | 0             | 0             | 0             |
| 0             | 0             | 0             | 0             | 0             |

|               |               |               |               |               |
|---------------|---------------|---------------|---------------|---------------|
| 0             | 0             | 0             | 0             | 0             |
| 0             | 0             | 0             | 0             | 0             |
| $\frac{1}{5}$ | $\frac{1}{5}$ | $\frac{1}{5}$ | $\frac{1}{5}$ | $\frac{1}{5}$ |
| 0             | 0             | 0             | 0             | 0             |
| 0             | 0             | 0             | 0             | 0             |

|               |               |               |               |               |
|---------------|---------------|---------------|---------------|---------------|
| 0             | 0             | 0             | 0             | 0             |
| $\frac{1}{5}$ | 0             | 0             | 0             | 0             |
| 0             | $\frac{1}{5}$ | $\frac{1}{5}$ | $\frac{1}{5}$ | 0             |
| 0             | 0             | 0             | 0             | $\frac{1}{5}$ |
| 0             | 0             | 0             | 0             | 0             |
